# Supplementary material for: Gene expression profiles of lung adenocarcinoma linked to histopathological grading and survival but not to EGF-R status: a microarray study
Source: BMC Cancer. 2010 Mar 2;10:77. doi: 10.1186/1471-2407-10-77 (PMC2843676; doi:10.1186/1471-2407-10-77)
Supplement: Additional file 1 — Supplemental table S1. Genes extracted from nine metagene signatures according to Potti et al. The table contains detailed information of the Affymetrix probe set numbers, gene names and gene symbols of the 114 genes extracted from nine metagene signatures according to Potti et al. [file 1471-2407-10-77-S1.XLS]

## Sheet: Potti et al. NEJM 2006
	ProbeSet ID	Gene Name	Gene Symbol
	200045_at	ATP-binding cassette, sub-family F (GCN20), member 1	ABCF1
	200834_s_at	ribosomal protein S21	RPS21
	200881_s_at	DnaJ (Hsp40) homolog, subfamily A, member 1	DNAJA1
	200908_s_at	---	---
	200981_x_at	GNAS complex locus	GNAS
	200995_at	importin 7	IPO7
	201037_at	phosphofructokinase, platelet	PFKP
	201116_s_at	carboxypeptidase E	CPE
	201120_s_at	progesterone receptor membrane component 1	PGRMC1
	201138_s_at	Sjogren syndrome antigen B (autoantigen La)	SSB
	201159_s_at	N-myristoyltransferase 1	NMT1
	201182_s_at	chromodomain helicase DNA binding protein 4	CHD4
	201455_s_at	aminopeptidase puromycin sensitive	NPEPPS
	201637_s_at	fragile X mental retardation, autosomal homolog 1	FXR1
	201850_at	capping protein (actin filament), gelsolin-like	CAPG
	201895_at	v-raf murine sarcoma 3611 viral oncogene homolog	ARAF
	202325_s_at	ATP synthase, H+ transporting, mitochondrial F0 complex, subunit F6	ATP5J
	202539_s_at	3-hydroxy-3-methylglutaryl-Coenzyme A reductase	HMGCR
	202666_s_at	actin-like 6A	ACTL6A
	202964_s_at	regulatory factor X, 5 (influences HLA class II expression)	RFX5
	203018_s_at	synovial sarcoma, X breakpoint 2 interacting protein	SSX2IP
	203741_s_at	adenylate cyclase 7	ADCY7
	203766_s_at	leiomodin 1 (smooth muscle)	LMOD1
	203850_s_at	kinesin family member 1	KIF1A
	203859_s_at	paralemmin	PALM
	203914_x_at	hydroxyprostaglandin dehydrogenase 15-(NAD)	HPGD
	203969_at	hypothetical protein LOC153914	LOC153914
	203971_at	solute carrier family 31 (copper transporters), member 1	SLC31A1
	204122_at	TYRO protein tyrosine kinase binding protein	TYROBP
	204168_at	microsomal glutathione S-transferase 2	MGST2
	204189_at	retinoic acid receptor, gamma	RARG
	204381_at	low density lipoprotein receptor-related protein 3	LRP3
	204633_s_at	ribosomal protein S6 kinase, 90kDa, polypeptide 5	RPS6KA5
	204727_at	WD repeat and HMG-box DNA binding protein 1	WDHD1
	204928_s_at	solute carrier family 10 (sodium/bile acid cotransporter family), member 3	SLC10A3
	205094_at	peroxisomal biogenesis factor 12	PEX12
	205339_at	TAL1 (SCL) interrupting locus	SIL
	205556_at	msh homeobox 2	MSX2
	205734_s_at	lymphoid nuclear protein related to AF4	LAF4
	205767_at	epiregulin	EREG
	205844_at	vanin 1 vanin 1	VNN1
	205887_x_at	mutS homolog 3 (E. coli)	MSH3
	206066_s_at	RAD51 homolog C (S. cerevisiae)	RAD51C
	206143_at	solute carrier family 26, member 3	SLC26A3
	206186_at	membrane protein, palmitoylated 3 (MAGUK p55 subfamily member 3)	MPP3
	206302_s_at	nudix (nucleoside diphosphate linked moietyX)-type motif 4	NUDT4
	206308_at	DNA (cytosine-5-)-methyltransferase 2	DNMT2
	206370_at	phosphoinositide-3-kinase, catalytic, gamma polypeptide	PIK3CG
	206390_x_at	platelet factor 4 (chemokine (C-X-C motif) ligand 4)	PF4
	206691_s_at	protein disulfide isomerase, pancreatic	PDIP
	206692_at	potassium inwardly-rectifying channel, subfamily J, member 10	KCNJ10
	206912_at	forkhead box E1 (thyroid transcription factor 2)	FOXE1
	206923_at	protein kinase C, alpha	PRKCA
	206924_at	interleukin 11	IL11
	207096_at	serum amyloid A4, constitutive	SAA4
	207108_s_at	Nipped-B homolog (Drosophila)	NIPBL
	207260_at	FEV (ETS oncogene family)	FEV
	207355_at	solute carrier family 1 (glutamate transporter), member 7	SLC1A7
	207572_at	---	---
	207606_s_at	Rho GTPase activating protein 12	ARHGAP12
	207723_s_at	killer cell lectin-like receptor subfamily C, member 3	KLRC3
	207737_at	---	---
	207814_at	defensin, alpha 6, Paneth cell-specific	DEFA6
	208008_at	DKFZP434O047 protein	DKFZP434O047
	208755_x_at	H3 histone, family 3A	H3F3A
	208902_s_at	FLJ46061 protein	FLJ46061
	209024_s_at	synaptotagmin binding, cytoplasmic RNA interacting protein	SYNCRIP
	209252_at	histidyl-tRNA synthetase-like	HARSL
	209343_at	EF hand domain family, member D1	EFHD1
	209590_at	Bone morphogenetic protein 7 (osteogenic protein 1)	BMP7
	209751_s_at	trafficking protein particle complex 2	TRAPPC2
	209963_s_at	erythropoietin receptor	EPOR
	209971_x_at	JTV1 gene	JTV1
	210349_at	calcium/calmodulin-dependent protein kinase IV	CAMK4
	210381_s_at	cholecystokinin B receptor	CCKBR
	210431_at	alkaline phosphatase, placental-like 2	ALPPL2
	210609_s_at	tumor protein p53 inducible protein 3	TP53I3
	210650_s_at	---	---
	210785_s_at	chromosome 1 open reading frame 38	C1orf38
	210794_s_at	maternally expressed 3 hypothetical gene supported by BX161452	MEG3 LOC440199
	211062_s_at	carboxypeptidase Z carboxypeptidase Z	CPZ
	211154_at	thrombopoietin (myeloproliferative leukemia virus oncogene ligand, megakaryocyte growth and development factor)	THPO
	211165_x_at	EPH receptor B2	EPHB2
	211211_x_at	SH2 domain protein 1A, Duncan's disease (lymphoproliferative syndrome)	SH2D1A
	211326_x_at	hemochromatosis	HFE
	211369_at	---	---
	211442_x_at	cytochrome P450, family 3, subfamily A, polypeptide 43	CYP3A43
	211444_at	---	---
	211720_x_at	ribosomal protein, large, P0 ribosomal protein, large, P0	RPLP0
	211778_s_at	zinc finger protein 339 zinc finger protein 339	ZNF339
	212016_s_at	polypyrimidine tract binding protein 1	PTBP1
	212034_s_at	exocyst complex component 7	EXOC7
	212169_at	FK506 binding protein 9, 63 kDa	FKBP9
	212360_at	adenosine monophosphate deaminase 2 (isoform L)	AMPD2
	212410_at	EF hand domain family, member A1	EFHA1
	212579_at	KIAA0650 protein	KIAA0650
	212600_s_at	ubiquinol-cytochrome c reductase core protein II	UQCRC2
	212787_at	YLP motif containing 1	YLPM1
	212986_s_at	tousled-like kinase 2	TLK2
	213143_at	hypothetical protein LOC257407	LOC257407
	213188_s_at	MYC induced nuclear antigen	MINA
	213244_at	secretory carrier membrane protein 4	SCAMP4
	213433_at	ADP-ribosylation factor-like 3	ARL3
	213443_at	---	---
	213507_s_at	karyopherin (importin) beta 1	KPNB1
	213517_at	Poly(rC) binding protein 2	PCBP2
	213575_at	Transformer-2 alpha	TRA2A
	213650_at	golgin-67	GOLGIN-67
	213693_s_at	Mucin 1, transmembrane	MUC1
	213873_at	---	---
	213935_at	abhydrolase domain containing 5	ABHD5
	214082_at	carbonic anhydrase VB, mitochondrial	CA5B
	214207_s_at	---	---
	214421_x_at	cytochrome P450, family 2, subfamily C, polypeptide 9	CYP2C9
	Supplemental table 1
